# Supplementary material for: Awareness, Attitudes, and Acceptance Toward Gender Correction Among Undergraduate Students at King Faisal University: A Cross-Sectional Study
Source: Research Square preprint supplement (doi:10.21203/rs.3.rs-6215317/v1), 2025-04-24
Supplement: Supplementary file 1 [file 1a6f0c40f2964a8f7e6a63b1.docx]

Questionnaire Developed for the Study: **Awareness, Attitudes, and Acceptance Toward Gender Correction Among Undergraduate Students at King Faisal University: A Cross-Sectional Study**

# Section 1: Personal Information

1. Gender:

- Male

- Female

2. Age:

- 18-20

- 21-24

- 25+

3. College Affiliation:

- Health-related College

- Non-health-related College

## Section 2: Awareness Level Regarding Gender Correction

1. Are you aware of the term 'gender correction'?

- Yes

- No

**Section 3: Awareness of the Distinctions Between Gender Correction and Transgender**

1. Gender correction is undertaken for biological reasons.

- Yes

- No

2. Transgender involves changing one’s name and physical appearance and using appropriate pronouns.

- Yes

- No

3. Gender correction refers to the process of addressing physical or anatomical disparities or abnormalities present since birth.

- Yes

- No

4. Gender correction involves modifying physical features to align with the desired gender identity.

- Yes

- No

5. Gender correction is performed for psychological reasons only.

- Yes

- No

6. Most cases of gender correction are identified later in life.

- Yes

- No

7. Over the course of 15 years, more than 2,000 gender reassignment surgeries have been performed in Saudi Arabia.

- Yes

- No

8. Gender correction and transgender are considered synonymous terms and can be used interchangeably.

- Yes

- No

## Section 4: Societal Attitudes and Acceptance Toward Gender Correction

1. Individuals who have undergone gender correction are normal people.

- Strongly Agree

- Agree

- Neutral

- Disagree

- Strongly Disagree

2. I am open to living with someone who has undergone gender correction.

- Strongly Agree

- Agree

- Neutral

- Disagree

- Strongly Disagree

3. I have treated/would treat a person who has undergone gender correction as a normal person.

- Strongly Agree

- Agree

- Neutral

- Disagree

- Strongly Disagree

4. There is a need to raise awareness about gender correction.

- Strongly Agree

- Agree

- Neutral

- Disagree

- Strongly Disagree

5. There is a need for more attention to gender correction and individuals who have undergone such procedures.

- Strongly Agree

- Agree

- Neutral

- Disagree

- Strongly Disagree

6. I am interested in watching/attending interviews, programs, or courses discussing gender correction.

- Strongly Agree

- Agree

- Neutral

- Disagree

- Strongly Disagree

7. There is a need for specialized centers for treating gender correction cases in Saudi Arabia.

- Strongly Agree

- Agree

- Neutral

- Disagree

- Strongly Disagree
